# Supplementary material for: Two-Dose Ceftiofur Treatment Increases Cephamycinase Gene Quantities and Fecal Microbiome Diversity in Dairy Cows Diagnosed with Metritis
Source: MDPI journal article supplement (doi:10.3390/microorganisms11112728), 2023-11-08
Supplement: s1 [file s1]

# Two-dose ceftiofur treatment increases cephamycinase gene quantities and fecal microbiome diversity in dairy cows diagnosed with metritis

**Claudia Ossa-Trujillo<sup>1</sup>, Ethan A. Taylor<sup>2</sup>, Fatima Sarwar<sup>2</sup>, Javier Vinasco<sup>2</sup>, Ellen R. Jordan<sup>3</sup>, Jose A. García Buitrago<sup>4</sup>, G. Robert Hagevoort<sup>4</sup>, Sara D. Lawhon<sup>2</sup>, Juan M. Piñeiro<sup>5</sup>, Jessica Galloway-Peña<sup>2</sup>, Keri N. Norman<sup>1,†,\*</sup>, Harvey Morgan Scott<sup>2,†,\*</sup>**

<sup>1</sup> Department of Veterinary Integrative Biosciences, College of Veterinary Medicine and Biomedical Sciences, Texas A&M University, College Station, TX, USA; cossat@tamu.edu (C.O.T.)

<sup>2</sup> Department of Veterinary Pathobiology, Texas A&M University, College Station, TX, USA; eataylor2136@gmail.com (E.A.T.); fatimasarwar15@gmail.com (F.S.); jvinasco-torres@cvm.tamu.edu (J.V.T.); slawhon@cvm.tamu.edu (S.D.L.); jgallowaypena@cvm.tamu.edu (J.G.P.)

<sup>3</sup> Department of Animal Science, Texas A&M University, Dallas, TX, USA; txjordanqh@yahoo.com (E.R.J.)

<sup>4</sup> Department of Extension Animal Sciences and Natural Resources, New Mexico State University, Clovis, NM, USA; jarmando@nmsu.edu (J.A.G.); dairydoc@nmsu.edu (G.R.H.)

<sup>5</sup> Department of Animal Science, Texas A&M University, Amarillo, TX, USA; juan.pineiro@ag.tamu.edu (J.M.P.)

\*Correspondence: knorman@cvm.tamu.edu (K.N.N.); hmscott@cvm.tamu.edu (H.M.S.)

† These authors contributed equally to this work

Table S1. 744 fecal samples across days 0, 6, and 16, pooled in four groups by dairy farm, day, and treatment (192 fecal pools in total)(labID-DairyTreatment-AnimalID-SampleDay-Season).

| Day 0 (Yellow = Missing) |                  |    |                  |    |                  |    |                  |                    |                  |
|--------------------------|------------------|----|------------------|----|------------------|----|------------------|--------------------|------------------|
| Treated                  |                  |    |                  |    | Untreated        |    |                  |                    |                  |
| 1                        | Group 1A-Ca:     | 12 | Group 1B-Ca:     | 23 | Group 1C-Ca:     | 33 | Group 2A-Co:     | Group 2B-Co:       | Group 2C-Co:     |
|                          | 1-A1-9338-0-1    |    | 31-B1-36031-0-1  |    | 63-C1-15522-0-1  |    | 2-A2-11209-0-1   | 32-B2-40165-0-1    | 64-C2-16463-0-1  |
|                          | 3-A1-13028-0-1   |    | 33-B1-40812-0-1  |    | 65-C1-21250-0-1  |    | 4-A2-12908-0-1   | 34-B2-40905-0-1    | 66-C2-21191-0-1  |
|                          | 5-A1-12929-0-1   |    | 35-B1-40735-0-1  |    | 67-C1-21211-0-1  |    | 6-A2-12984-0-1   | 36-B2-40705-0-1    | 68-C2-21041-0-1  |
|                          | 7-A1-12108-0-1   |    | 37-B1-40923-0-1  |    | 69-C1-16443-0-1  |    | 8-A2-12778-0-1   | 38-B2-40799-0-1    | 70-C2-18858-0-1  |
| 2                        | Group 3A-Ca:     | 13 | Group 3B-Ca:     | 24 | Group 3C-Ca:     | 34 | Group 4A-Co:     | Group 4B-Co:       | Group 4C-Co:     |
|                          | 9-A1-13233-0-1   |    | 39-B1-40983-0-1  |    | 71-C1-21276-0-1  |    | 10-A2-12975-0-1  | 40-B2-40978-0-1    | 72-C2-21004-0-1  |
|                          | 11-A1-10405-0-1  |    | 41-B1-31444-0-1  |    | 73-C1-19111-0-1  |    | 12-A2-10844-0-1  | 42-B2-29555-0-1    | 74-C2-19003-0-1  |
|                          | 13-A1-10481-0-1  |    | 43-B1-33139-0-1  |    | 75-C1-19827-0-1  |    | 14-A2-6166-0-1   | 44-B2-33100-0-1    | 76-C2-19104-0-1  |
|                          | 15-A1-13108-0-1  |    | 45-B1-40968-0-1  |    | 77-C1-19097-0-1  |    | 16-A2-13301-0-1  | 46-B2-40974-0-1    | 78-C2-18999-0-1  |
| 3                        | Group 5A-Ca:     | 14 | Group 5B-Ca:     | 25 | Group 5C-Ca:     | 35 | Group 6A-Co:     | Group 6B-Co:       | Group 6C-Co:     |
|                          | 17-A1-13286-0-1  |    | 47-B1-40824-0-1  |    | 79-C1-8487-0-1   |    | 18-A2-12946-0-1  | 48-B2-40889-0-1    | 80-C2-18595-0-1  |
|                          | 19-A1-11374-0-1  |    | 49-B1-34376-0-1  |    | 81-C1-21188-0-1  |    | 20-A2-10813-0-1  | 50-B2-32452-0-1    | 82-C2-20427-0-1  |
|                          | 21-A1-13026-0-1  |    | 51-B1-36165-0-1  |    | 83-C1-17501-0-1  |    | 22-A2-13289-0-1  | 52-B2-40908-0-1    | 84-C2-18112-0-1  |
|                          | 23-A1-13302-0-1  |    | 53-B1-30994-0-1  |    | 85-C1-20201-0-1  |    | 24-A2-13137-0-1  | 54-B2-40843-0-1    | 86-C2-20322-0-1  |
| 4                        | Group 7A-Ca:     | 15 | Group 7B-Ca:     | 26 | Group 7C-Ca:     | 36 | Group 8A-Co:     | Group 8B-Co:       | Group 8C-Co:     |
|                          | 25-A1-13332-0-1  |    | 55-B1-40981-0-1  |    | 87-C1-21196-0-1  |    | 26-A2-13069-0-1  | 56-B2-40821-0-1    | 88-C2-21398-0-1  |
|                          | 27-A1-12917-0-1  |    | 57-B1-40734-0-1  |    | 89-C1-20994-0-1  |    | 28-A2-12954-0-1  | 58-B2-38424-0-1    | 90-C2-20326-0-1  |
|                          | 29-A1-13217-0-1  |    | 59-B1-29166-0-1  |    | 91-C1-21035-0-1  |    | 30-A2-13095-0-1  | 60-B2-40631-0-1    | 92-C2-21148-0-1  |
|                          | 1-A1-10277-0-2   |    | 61-B1-44088-0-1  |    | 101-C1-19732-0-2 |    | 2-A2-54-0-2      | 62-B2-32193-0-1    | 102-C2-19822-0-2 |
| 5                        | Group 9A-Ca:     | 16 | Group 9B-Ca:     | 27 | Group 9C-Ca:     | 37 | Group 10A-Co:    | Group 10B-Co:      | Group 10C-Co:    |
|                          | 3-A1-3846-0-2    |    | 51-B1-43305-0-2  |    | 103-C1-21860-0-2 |    | 4-A2-10313-0-2   | 52-B2-32010-0-2    | 104-C2-21576-0-2 |
|                          | 5-A1-6098-0-2    |    | 53-B1-43359-0-2  |    | 105-C1-22072-0-2 |    | 6-A2-6772-0-2    | 54-B2-41841-0-2    | 106-C2-21805-0-2 |
|                          | 7-A1-12585-0-2   |    | 55-B1-43367-0-2  |    | 107-C1-21096-0-2 |    | 8-A2-10132-0-2   | 56-B2-43028-0-2    | 108-C2-21822-0-2 |
|                          | 9-A1-14134-0-2   |    | 57-B1-43451-0-2  |    | 109-C1-21563-0-2 |    | 10-A2-13736-0-2  | 58-B2-43429-0-2    | 110-C2-21164-0-2 |
| 6                        | Group 11A-Ca:    | 17 | Group 11B-Ca:    | 28 | Group 11C-Ca:    | 38 | Group 12A-Co:    | Group 12B-Co:      | Group 12C-Co:    |
|                          | 11-A1-14165-0-2  |    | 59-B1-26908-0-2  |    | 111-C1-18488-0-2 |    | 12-A2-14000-0-2  | 60-B2-28765-0-2    | 112-C2-21673-0-2 |
|                          | 13-A1-13959-0-2  |    | 61-B1-31714-0-2  |    | 113-C1-21857-0-2 |    | 14-A2-12492-0-2  | 62-B2-30874-0-2    | 114-C2-18071-0-2 |
|                          | 15-A1-13944-0-2  |    | 63-B1-37214-0-2  |    | 115-C1-22043-0-2 |    | 16-A2-14127-0-2  | 64-B2-41490-0-2    | 116-C2-21922-0-2 |
|                          | 17-A1-13590-0-2  |    | 65-B1-41918-0-2  |    | 117-C1-20037-0-2 |    | 18-A2-13815-0-2  | 66-B2-43394-0-2    | 118-C2-22265-0-2 |
| 7                        | Group 13A-Ca:    | 18 | Group 13B-Ca:    | 29 | Group 13C-Ca:    | 39 | Group 14A-Co:    | Group 14B-Co:      | Group 14C-Co:    |
|                          | 19-A1-14214-0-2  |    | 67-B1-37051-0-2  |    | 119-C1-21882-0-2 |    | 20-A2-13948-0-2  | 68-B2-37713-0-2    | 120-C2-21833-0-2 |
|                          | 21-A1-13596-0-2  |    | 69-B1-37890-0-2  |    | 121-C1-22256-0-2 |    | 22-A2-13935-0-2  | 70-B2-41095-0-2    | 122-C2-845-0-2   |
|                          | 23-A1-13934-0-2  |    | 71-B1-43361-0-2  |    | 123-C1-19590-0-2 |    | 24-A2-14263-0-2  | 72-B2-43246(1)-0-2 | 124-C2-19680-0-2 |
|                          | 25-A1-14161-0-2  |    | 73-B1-43485-0-2  |    | 125-C1-19623-0-2 |    | 26-A2-14013-0-2  | 74-B2-41843-0-2    | 126-C2-19664-0-2 |
| 8                        | Group 15A-Ca:    | 19 | Group 15B-Ca:    | 30 | Group 15C-Ca:    | 40 | Group 16A-Co:    | Group 16B-Co:      | Group 16C-Co:    |
|                          | 27-A1-12660-0-2  |    | 75-B1-36248-0-2  |    | 127-C1-20401-0-2 |    | 28-A2-11840-0-2  | 76-B2-33482-0-2    | 128-C2-19774-0-2 |
|                          | 29-A1-10368-0-2  |    | 77-B1-41813-0-2  |    | 129-C1-22557-0-2 |    | 30-A2-12690-0-2  | 78-B2-35559-0-2    | 130-C2-22202-0-2 |
|                          | 31-A1-11754-0-2  |    | 79-B1-43283-0-2  |    | 131-C1-22367-0-2 |    | 32-A2-11089-0-2  | 80-B2-43246(2)-0-2 | 132-C2-21855-0-2 |
|                          | 33-A1-10604-0-2  |    | 81-B1-37962-0-2  |    | 133-C1-22604-0-2 |    | 34-A2-6770-0-2   | 82-B2-30763-0-2    | 134-C2-22136-0-2 |
| 9                        | Group 17A-Ca:    | 20 | Group 17B-Ca:    | 31 | Group 17C-Ca:    | 41 | Group 18A-Co:    | Group 18B-Co:      | Group 18C-Co:    |
|                          | 35-A1-14143-0-2  |    | 83-B1-35558-0-2  |    | 135-C1-22431-0-2 |    | 36-A2-14197-0-2  | 84-B2-43449-0-2    | 136-C2-22119-0-2 |
|                          | 37-A1-14782-0-2  |    | 85-B1-43322-0-2  |    | 137-C1-18815-0-2 |    | 38-A2-14307-0-2  | 86-B2-41733-0-2    | 138-C2-19712-0-2 |
|                          | 39-A1-3082-0-2   |    | 87-B1-40510-0-2  |    | 139-C1-21990-0-2 |    | 40-A2-2654-0-2   | 88-B2-43835-0-2    | 140-C2-22560-0-2 |
|                          | 41-A1-10815-0-2  |    | 89-B1-46730-0-2  |    | 141-C1-21856-0-2 |    | 42-A2-12716-0-2  | 90-B2-44120-0-2    | 142-C2-21642-0-2 |
| 10                       | Group 19A-Ca:    | 21 | Group 19B-Ca:    | 32 | Group 19C-Ca:    | 42 | Group 20A-Co:    | Group 20B-Co:      | Group 20C-Co:    |
|                          | 43-A1-10677-0-2  |    | 91-B1-44003-0-2  |    | 143-C1-22028-0-2 |    | 44-A2-12458-0-2  | 92-B2-43986-0-2    | 144-C2-22384-0-2 |
|                          | 45-A1-12147-0-2  |    | 93-B1-24231-0-2  |    | 145-C1-20208-0-2 |    | 46-A2-9389-0-2   | 94-B2-29955-0-2    | 146-C2-22568-0-2 |
|                          | 47-A1-14583-0-2  |    | 95-B1-43984-0-2  |    | 147-C1-21804-0-2 |    | 48-A2-14688-0-2  | 96-B2-38404-0-2    | 148-C2-21918-0-2 |
|                          | 49-A1-17686-0-2  |    | 97-B1-26145-0-2  |    | 149-C1-22558-0-2 |    | 50-A2-10456-0-2  | 98-B2-37126-0-2    | 150-C2-22504-0-2 |
| 11                       | Group 21A-Ca:    | 22 | Group 21B-Ca:    |    |                  | 43 | Group 22A-Co:    | Group 22B-Co:      |                  |
|                          | 153-A1-8139-0-2  |    | 99-B1-37198-0-2  |    |                  |    | 154-A2-4345-0-2  | 100-B2-44017-0-2   |                  |
|                          | 155-A1-14716-0-2 |    | 151-B1-31145-0-2 |    |                  |    | 156-A2-14282-0-2 | 152-B2-30881-0-2   |                  |

Table S1. Continuation. The yellow highlight indicates missing feces due to insufficient sample to add to the pool.

| Day 6 (Yellow = Missing) |                  |    |                  |    |                  |           |                  |     |                    |     |                  |
|--------------------------|------------------|----|------------------|----|------------------|-----------|------------------|-----|--------------------|-----|------------------|
| Treated                  |                  |    |                  |    |                  | Untreated |                  |     |                    |     |                  |
| 65                       | Group 1A-Ca:     | 76 | Group 1B-Ca:     | 87 | Group 1C-Ca:     | 97        | Group 2A-Co:     | 108 | Group 2B-Co:       | 119 | Group 2C-Co:     |
|                          | 1-A1-9338-6-1    |    | 31-B1-36031-6-1  |    | 63-C1-15522-6-1  |           | 2-A2-11209-6-1   |     | 32-B2-40165-6-1    |     | 64-C2-16463-6-1  |
|                          | 3-A1-13028-6-1   |    | 33-B1-40812-6-1  |    | 65-C1-21250-6-1  |           | 4-A2-12908-6-1   |     | 34-B2-40905-6-1    |     | 66-C2-21191-6-1  |
|                          | 5-A1-12929-6-1   |    | 35-B1-40735-6-1  |    | 67-C1-21211-6-1  |           | 6-A2-12984-6-1   |     | 36-B2-40705-6-1    |     | 68-C2-21041-6-1  |
|                          | 7-A1-12108-6-1   |    | 37-B1-40923-6-1  |    | 69-C1-16443-6-1  |           | 8-A2-12778-6-1   |     | 38-B2-40799-6-1    |     | 70-C2-18858-6-1  |
| 66                       | Group 3A-Ca:     | 77 | Group 3B-Ca:     | 88 | Group 3C-Ca:     | 98        | Group 4A-Co:     | 109 | Group 4B-Co:       | 120 | Group 4C-Co:     |
|                          | 9-A1-13233-6-1   |    | 39-B1-40983-6-1  |    | 71-C1-21276-6-1  |           | 10-A2-12975-6-1  |     | 40-B2-40978-6-1    |     | 72-C2-21004-6-1  |
|                          | 11-A1-10405-6-1  |    | 41-B1-31444-6-1  |    | 73-C1-19111-6-1  |           | 12-A2-10844-6-1  |     | 42-B2-29555-6-1    |     | 74-C2-19003-6-1  |
|                          | 13-A1-10481-6-1  |    | 43-B1-33139-6-1  |    | 75-C1-19827-6-1  |           | 14-A2-6166-6-1   |     | 44-B2-33100-6-1    |     | 76-C2-19104-6-1  |
|                          | 15-A1-13108-6-1  |    | 45-B1-40968-6-1  |    | 77-C1-19097-6-1  |           | 16-A2-13301-6-1  |     | 46-B2-40974-6-1    |     | 78-C2-18999-6-1  |
| 67                       | Group 5A-Ca:     | 78 | Group 5B-Ca:     | 89 | Group 5C-Ca:     | 99        | Group 6A-Co:     | 110 | Group 6B-Co:       | 121 | Group 6C-Co:     |
|                          | 17-A1-13286-6-1  |    | 47-B1-40824-6-1  |    | 79-C1-8487-6-1   |           | 18-A2-12946-6-1  |     | 48-B2-40889-6-1    |     | 80-C2-18595-6-1  |
|                          | 19-A1-11374-6-1  |    | 49-B1-34376-6-1  |    | 81-C1-21188-6-1  |           | 20-A2-10813-6-1  |     | 50-B2-32452-6-1    |     | 82-C2-20427-6-1  |
|                          | 21-A1-13026-6-1  |    | 51-B1-36165-6-1  |    | 83-C1-17501-6-1  |           | 22-A2-13289-6-1  |     | 52-B2-40908-6-1    |     | 84-C2-18112-6-1  |
|                          | 23-A1-13302-6-1  |    | 53-B1-30994-6-1  |    | 85-C1-20201-6-1  |           | 24-A2-13137-6-1  |     | 54-B2-40843-6-1    |     | 86-C2-20322-6-1  |
| 68                       | Group 7A-Ca:     | 79 | Group 7B-Ca:     | 90 | Group 7C-Ca:     | 100       | Group 8A-Co:     | 111 | Group 8B-Co:       | 122 | Group 8C-Co:     |
|                          | 25-A1-13332-6-1  |    | 55-B1-40981-6-1  |    | 87-C1-21196-6-1  |           | 26-A2-13069-6-1  |     | 56-B2-40821-6-1    |     | 88-C2-21398-6-1  |
|                          | 27-A1-12917-6-1  |    | 57-B1-40734-6-1  |    | 89-C1-20994-6-1  |           | 28-A2-12954-6-1  |     | 58-B2-38424-6-1    |     | 90-C2-20326-6-1  |
|                          | 29-A1-13217-6-1  |    | 59-B1-29166-6-1  |    | 91-C1-21035-6-1  |           | 30-A2-13095-6-1  |     | 60-B2-40631-6-1    |     | 92-C2-21148-6-1  |
|                          | 1-A1-10277-6-2   |    | 61-B1-44088-6-1  |    | 101-C1-19732-6-2 |           | 2-A2-54-6-2      |     | 62-B2-32193-6-1    |     | 102-C2-19822-6-2 |
| 69                       | Group 9A-Ca:     | 80 | Group 9B-Ca:     | 91 | Group 9C-Ca:     | 101       | Group 10A-Co:    | 112 | Group 10B-Co:      | 123 | Group 10C-Co:    |
|                          | 3-A1-3846-6-2    |    | 51-B1-43305-6-2  |    | 103-C1-21860-6-2 |           | 4-A2-10313-6-2   |     | 52-B2-32010-6-2    |     | 104-C2-21576-6-2 |
|                          | 5-A1-6098-6-2    |    | 53-B1-43359-6-2  |    | 105-C1-22072-6-2 |           | 6-A2-6772-6-2    |     | 54-B2-41841-6-2    |     | 106-C2-21805-6-2 |
|                          | 7-A1-12585-6-2   |    | 55-B1-43367-6-2  |    | 107-C1-21096-6-2 |           | 8-A2-10132-6-2   |     | 56-B2-43028-6-2    |     | 108-C2-21822-6-2 |
|                          | 9-A1-14134-6-2   |    | 57-B1-43451-6-2  |    | 109-C1-21563-6-2 |           | 10-A2-13736-6-2  |     | 58-B2-43429-6-2    |     | 110-C2-21164-6-2 |
| 70                       | Group 11A-Ca:    | 81 | Group 11B-Ca:    | 92 | Group 11C-Ca:    | 102       | Group 12A-Co:    | 113 | Group 12B-Co:      | 124 | Group 12C-Co:    |
|                          | 11-A1-14165-6-2  |    | 59-B1-26908-6-2  |    | 111-C1-18488-6-2 |           | 12-A2-14000-6-2  |     | 60-B2-28765-6-2    |     | 112-C2-21673-6-2 |
|                          | 13-A1-13959-6-2  |    | 61-B1-31714-6-2  |    | 113-C1-21857-6-2 |           | 14-A2-12492-6-2  |     | 62-B2-30874-6-2    |     | 114-C2-18071-6-2 |
|                          | 15-A1-13944-6-2  |    | 63-B1-37214-6-2  |    | 115-C1-22043-6-2 |           | 16-A2-14127-6-2  |     | 64-B2-41490-6-2    |     | 116-C2-21922-6-2 |
|                          | 17-A1-13590-6-2  |    | 65-B1-41918-6-2  |    | 117-C1-20037-6-2 |           | 18-A2-13815-6-2  |     | 66-B2-43394-6-2    |     | 118-C2-22265-6-2 |
| 71                       | Group 13A-Ca:    | 82 | Group 13B-Ca:    | 93 | Group 13C-Ca:    | 103       | Group 14A-Co:    | 114 | Group 14B-Co:      | 125 | Group 14C-Co:    |
|                          | 19-A1-14214-6-2  |    | 67-B1-37051-6-2  |    | 119-C1-21882-6-2 |           | 20-A2-13948-6-2  |     | 68-B2-37713-6-2    |     | 120-C2-21833-6-2 |
|                          | 21-A1-13596-6-2  |    | 69-B1-37890-6-2  |    | 121-C1-22256-6-2 |           | 22-A2-13935-6-2  |     | 70-B2-41095-6-2    |     | 122-C2-845-6-2   |
|                          | 23-A1-13934-6-2  |    | 71-B1-43361-6-2  |    | 123-C1-19590-6-2 |           | 24-A2-14263-6-2  |     | 72-B2-43246(1)-6-2 |     | 124-C2-19680-6-2 |
|                          | 25-A1-14161-6-2  |    | 73-B1-43485-6-2  |    | 125-C1-19623-6-2 |           | 26-A2-14013-6-2  |     | 74-B2-41843-6-2    |     | 126-C2-19664-6-2 |
| 72                       | Group 15A-Ca:    | 83 | Group 15B-Ca:    | 94 | Group 15C-Ca:    | 104       | Group 16A-Co:    | 115 | Group 16B-Co:      | 126 | Group 16C-Co:    |
|                          | 27-A1-12660-6-2  |    | 75-B1-36248-6-2  |    | 127-C1-20401-6-2 |           | 28-A2-11840-6-2  |     | 76-B2-33482-6-2    |     | 128-C2-19774-6-2 |
|                          | 29-A1-10368-6-2  |    | 77-B1-41813-6-2  |    | 129-C1-22557-6-2 |           | 30-A2-12690-6-2  |     | 78-B2-35559-6-2    |     | 130-C2-22202-6-2 |
|                          | 31-A1-11754-6-2  |    | 79-B1-43283-6-2  |    | 131-C1-22367-6-2 |           | 32-A2-11089-6-2  |     | 80-B2-43246(2)-6-2 |     | 132-C2-21855-6-2 |
|                          | 33-A1-10604-6-2  |    | 81-B1-37962-6-2  |    | 133-C1-22604-6-2 |           | 34-A2-6770-6-2   |     | 82-B2-30763-6-2    |     | 134-C2-22136-6-2 |
| 73                       | Group 17A-Ca:    | 84 | Group 17B-Ca:    | 95 | Group 17C-Ca:    | 105       | Group 18A-Co:    | 116 | Group 18B-Co:      | 127 | Group 18C-Co:    |
|                          | 35-A1-14143-6-2  |    | 83-B1-35558-6-2  |    | 135-C1-22431-6-2 |           | 36-A2-14197-6-2  |     | 84-B2-43449-6-2    |     | 136-C2-22119-6-2 |
|                          | 37-A1-14782-6-2  |    | 85-B1-43322-6-2  |    | 137-C1-18815-6-2 |           | 38-A2-14307-6-2  |     | 86-B2-41733-6-2    |     | 138-C2-19712-6-2 |
|                          | 39-A1-3082-6-2   |    | 87-B1-40510-6-2  |    | 139-C1-21990-6-2 |           | 40-A2-2654-6-2   |     | 88-B2-43835-6-2    |     | 140-C2-22560-6-2 |
|                          | 41-A1-10815-6-2  |    | 89-B1-46730-6-2  |    | 141-C1-21856-6-2 |           | 42-A2-12716-6-2  |     | 90-B2-44120-6-2    |     | 142-C2-21642-6-2 |
| 74                       | Group 19A-Ca:    | 85 | Group 19B-Ca:    | 96 | Group 19C-Ca:    | 106       | Group 20A-Co:    | 117 | Group 20B-Co:      | 128 | Group 20C-Co:    |
|                          | 43-A1-10677-6-2  |    | 91-B1-44003-6-2  |    | 143-C1-22028-6-2 |           | 44-A2-12458-6-2  |     | 92-B2-43986-6-2    |     | 144-C2-22384-6-2 |
|                          | 45-A1-12147-6-2  |    | 93-B1-24231-6-2  |    | 145-C1-20208-6-2 |           | 46-A2-9389-6-2   |     | 94-B2-29955-6-2    |     | 146-C2-22568-6-2 |
|                          | 47-A1-14583-6-2  |    | 95-B1-43984-6-2  |    | 147-C1-21804-6-2 |           | 48-A2-14688-6-2  |     | 96-B2-38404-6-2    |     | 148-C2-21918-6-2 |
|                          | 49-A1-17686-6-2  |    | 97-B1-26145-6-2  |    | 149-C1-22558-6-2 |           | 50-A2-10456-6-2  |     | 98-B2-37126-6-2    |     | 150-C2-22504-6-2 |
| 75                       | Group 21A:       | 86 | Group 21B-Ca:    |    |                  | 107       | Group 22A-Co:    | 118 | Group 22B-Co:      |     |                  |
|                          | 153-A1-8139-6-2  |    | 99-B1-37198-6-2  |    |                  |           | 154-A2-4345-6-2  |     | 100-B2-44017-6-2   |     |                  |
|                          | 155-A1-14716-6-2 |    | 151-B1-31145-6-2 |    |                  |           | 156-A2-14282-6-2 |     | 152-B2-30881-6-2   |     |                  |

| Day 16 (Yellow = Missing) |                    |                  |     |                   |  |                  |                   |                  |     |                   |  |     |                  |  |     |                   |  |
|---------------------------|--------------------|------------------|-----|-------------------|--|------------------|-------------------|------------------|-----|-------------------|--|-----|------------------|--|-----|-------------------|--|
| Treated                   |                    |                  |     |                   |  | Untreated        |                   |                  |     |                   |  |     |                  |  |     |                   |  |
| 129                       | Group 1A-Ca:       |                  | 140 | Group 1B-Ca:      |  | 151              | Group 1C-Ca:      |                  | 161 | Group 2A-Co:      |  | 172 | Group 2B-Co:     |  | 183 | Group 2C-Co:      |  |
|                           | 1-A1-9338-16-1     |                  |     | 31-B1-36031-16-1  |  |                  | 63-C1-15522-16-1  |                  |     | 2-A2-11209-16-1   |  |     | 32-B2-40165-16-1 |  |     | 64-C2-16463-16-1  |  |
|                           | 3-A1-13028-16-1    |                  |     | 33-B1-40812-16-1  |  |                  | 65-C1-21250-16-1  |                  |     | 4-A2-12908-16-1   |  |     | 34-B2-40905-16-1 |  |     | 66-C2-21191-16-1  |  |
|                           | 5-A1-12929-16-1    |                  |     | 35-B1-40735-16-1  |  |                  | 67-C1-21211-16-1  |                  |     | 6-A2-12984-16-1   |  |     | 36-B2-40705-16-1 |  |     | 68-C2-21041-16-1  |  |
| 7-A1-12108-16-1           |                    | 37-B1-40923-16-1 |     | 69-C1-16443-16-1  |  | 8-A2-12778-16-1  |                   | 38-B2-40799-16-1 |     | 70-C2-18858-16-1  |  |     |                  |  |     |                   |  |
| 130                       | Group 3A-Ca:       |                  | 141 | Group 3B-Ca:      |  | 152              | Group 3C-Ca:      |                  | 162 | Group 4A-Co:      |  | 173 | Group 4B-Co:     |  | 184 | Group 4C-Co:      |  |
|                           | 9-A1-13233-16-1    |                  |     | 39-B1-40983-16-1  |  |                  | 71-C1-21276-16-1  |                  |     | 10-A2-12975-16-1  |  |     | 40-B2-40978-16-1 |  |     | 72-C2-21004-16-1  |  |
|                           | 11-A1-10405-16-1   |                  |     | 41-B1-31444-16-1  |  |                  | 73-C1-19111-16-1  |                  |     | 12-A2-10844-16-1  |  |     | 42-B2-29555-16-1 |  |     | 74-C2-19003-16-1  |  |
|                           | 13-A1-10481-16-1   |                  |     | 43-B1-33139-16-1  |  |                  | 75-C1-19827-16-1  |                  |     | 14-A2-6166-16-1   |  |     | 44-B2-33100-16-1 |  |     | 76-C2-19104-16-1  |  |
| 15-A1-13108-16-1          |                    | 45-B1-40968-16-1 |     | 77-C1-19097-16-1  |  | 16-A2-13301-16-1 |                   | 46-B2-40974-16-1 |     | 78-C2-18999-16-1  |  |     |                  |  |     |                   |  |
| 131                       | Group 5A-Ca:       |                  | 142 | Group 5B-Ca:      |  | 153              | Group 5C-Ca:      |                  | 163 | Group 6A-Co:      |  | 174 | Group 6B-Co:     |  | 185 | Group 6C-Co:      |  |
|                           | 17-A1-13286-16-1   |                  |     | 47-B1-40824-16-1  |  |                  | 79-C1-8487-16-1   |                  |     | 18-A2-12946-16-1  |  |     | 48-B2-40889-16-1 |  |     | 80-C2-18595-16-1  |  |
|                           | 19-A1-11374-16-1   |                  |     | 49-B1-34376-16-1  |  |                  | 81-C1-21188-16-1  |                  |     | 20-A2-10813-16-1  |  |     | 50-B2-32452-16-1 |  |     | 82-C2-20427-16-1  |  |
|                           | 21-A1-13026-16-1   |                  |     | 51-B1-36165-16-1  |  |                  | 83-C1-17501-16-1  |                  |     | 22-A2-13289-16-1  |  |     | 52-B2-40908-16-1 |  |     | 84-C2-18112-16-1  |  |
| 23-A1-13302-16-1          |                    | 53-B1-30994-16-1 |     | 85-C1-20201-16-1  |  | 24-A2-13137-16-1 |                   | 54-B2-40843-16-1 |     | 86-C2-20322-16-1  |  |     |                  |  |     |                   |  |
| 132                       | Group 7A-Ca:       |                  | 143 | Group 7B-Ca:      |  | 154              | Group 7C-Ca:      |                  | 164 | Group 8A-Co:      |  | 175 | Group 8B-Co:     |  | 186 | Group 8C-Co:      |  |
|                           | 25-A1-13332-16-1   |                  |     | 55-B1-40981-16-1  |  |                  | 87-C1-21196-16-1  |                  |     | 26-A2-13069-16-1  |  |     | 56-B2-40821-16-1 |  |     | 88-C2-21398-16-1  |  |
|                           | 27-A1-12917-16-1   |                  |     | 57-B1-40734-16-1  |  |                  | 89-C1-20994-16-1  |                  |     | 28-A2-12954-16-1  |  |     | 58-B2-38424-16-1 |  |     | 90-C2-20326-16-1  |  |
|                           | 29-A1-13217-16-1   |                  |     | 59-B1-29166-16-1  |  |                  | 91-C1-21035-16-1  |                  |     | 30-A2-13095-16-1  |  |     | 60-B2-40631-16-1 |  |     | 92-C2-21148-16-1  |  |
| 1-A1-10277-16-2           |                    | 61-B1-44088-16-1 |     | 101-C1-19732-16-2 |  | 2-A2-54-16-2     |                   | 62-B2-32193-16-1 |     | 102-C2-19822-16-2 |  |     |                  |  |     |                   |  |
| 133                       | Group 9A-Ca:       |                  | 144 | Group 9B-Ca:      |  | 155              | Group 9C-Ca:      |                  | 165 | Group 10A-Co:     |  | 176 | Group 10B-Co:    |  | 187 | Group 10C-Co:     |  |
|                           | 3-A1-3846-16-2     |                  |     | 51-B1-43305-16-2  |  |                  | 103-C1-21860-16-2 |                  |     | 4-A2-10313-16-2   |  |     | 52-B2-32010-16-2 |  |     | 104-C2-21576-16-2 |  |
|                           | 5-A1-6098-16-2     |                  |     | 53-B1-43359-16-2  |  |                  | 105-C1-22072-16-2 |                  |     | 6-A2-6772-16-2    |  |     | 54-B2-41841-16-2 |  |     | 106-C2-21805-16-2 |  |
|                           | 7-A1-12585-16-2    |                  |     | 55-B1-43367-16-2  |  |                  | 107-C1-21096-16-2 |                  |     | 8-A2-10132-16-2   |  |     | 56-B2-43028-16-2 |  |     | 108-C2-21822-16-2 |  |
| 9-A1-14134-16-2           |                    | 57-B1-43451-16-2 |     | 109-C1-21563-16-2 |  | 10-A2-13736-16-2 |                   | 58-B2-43429-16-2 |     | 110-C2-21164-16-2 |  |     |                  |  |     |                   |  |
| 134                       | Group 11A-Ca:      |                  | 145 | Group 11B-Ca:     |  | 156              | Group 11C-Ca:     |                  | 166 | Group 12A-Co:     |  | 177 | Group 12B-Co:    |  | 188 | Group 12C-Co:     |  |
|                           | 11-A1-14165-16-2   |                  |     | 59-B1-26908-16-2  |  |                  | 111-C1-18488-16-2 |                  |     | 12-A2-14000-16-2  |  |     | 60-B2-28765-16-2 |  |     | 112-C2-21673-16-2 |  |
|                           | 13-A1-13959-16-2   |                  |     | 61-B1-31714-16-2  |  |                  | 113-C1-21857-16-2 |                  |     | 14-A2-12492-16-2  |  |     | 62-B2-30874-16-2 |  |     | 114-C2-18071-16-2 |  |
|                           | 15-A1-13944-16-2</ |                  |     |                   |  |                  |                   |                  |     |                   |  |     |                  |  |     |                   |  |

Table S2. *E. coli* isolates previously sequenced that harbored the target genes used as positive controls and templates for qPCR standard curve generation.

| NCBI Biosample ID | MALDI-TOF               | <i>qnrB</i> gene | <i>bla</i> <sub>CMY</sub> gene | <i>bla</i> <sub>CTX-M</sub> gene | <i>mphA</i> gene |
|-------------------|-------------------------|------------------|--------------------------------|----------------------------------|------------------|
| SAMN14842436      | <i>Escherichia coli</i> | <i>qnrB19</i>    | <i>bla</i> <sub>CMY</sub>      | <i>bla</i> <sub>CTX-M</sub>      | <i>mphA</i>      |
| SAMN14842437      | <i>Escherichia coli</i> | <i>qnrB19</i>    | -                              | <i>bla</i> <sub>CTX-M</sub>      | <i>mphA</i>      |

Table S3. DNA extracted from the fecal samples distributed across the day, dairy, and treatment in 5 PCR plates per gene.

| PLATE 1 |          |         |          |          |          |           |
|---------|----------|---------|----------|----------|----------|-----------|
|         | 1-2      | 3-4     | 5-6      | 7-8      | 9-10     | 11-12     |
| A       | 1.00E+05 | 1A-Ca-0 | 9A-Ca-0  | 4A-Co-6  | 12A-Co-6 | 7A-Ca-16  |
| B       | 1.00E+04 | 2A-Co-0 | 10A-Co-0 | 5A-Ca-6  | 13A-Ca-6 | 8A-Co-16  |
| C       | 1.00E+03 | 3A-Ca-0 | 11A-Ca-0 | 6A-Co-6  | 1A-Ca-16 | 9A-Ca-16  |
| D       | 1.00E+02 | 4A-Co-0 | 12A-Co-0 | 7A-Ca-6  | 2A-Co-16 | 10A-Co-16 |
| E       | 1.01E+01 | 5A-Ca-0 | 13A-Ca-0 | 8A-Co-6  | 3A-Ca-16 | 11A-Ca-16 |
| F       | 1.00E+00 | 6A-Co-0 | 1A-Ca-6  | 9A-Ca-6  | 4A-Co-16 | 12A-Co-16 |
| G       | PTC      | 7A-Ca-0 | 2A-Co-6  | 10A-Co-6 | 5A-Ca-16 | 13A-Ca-16 |
| H       | NTC      | 8A-Co-0 | 3A-Ca-6  | 11A-Ca-6 | 6A-Co-16 |           |

  

| PLATE 2 |          |          |          |          |           |           |
|---------|----------|----------|----------|----------|-----------|-----------|
|         | 1-2      | 3-4      | 5-6      | 7-8      | 9-10      | 11-12     |
| A       | 1.00E+05 | 14A-Co-0 | 22A-Co-0 | 17A-Ca-6 | 3B-Ca-6   | 20A-Co-16 |
| B       | 1.00E+04 | 15A-Ca-0 | 1B-Ca-0  | 18A-Co-6 | 4B-Co-6   | 21A-Ca-16 |
| C       | 1.00E+03 | 16A-Co-0 | 2B-Co-0  | 19A-Ca-6 | 14A-Co-16 | 22A-Co-16 |
| D       | 1.00E+02 | 17A-Ca-0 | 3B-Ca-0  | 20A-Co-6 | 15A-Ca-16 | 1B-Ca-16  |
| E       | 1.01E+01 | 18A-Co-0 | 4B-Co-0  | 21A-Ca-6 | 16A-Co-16 | 2B-Co-16  |
| F       | 1.00E+00 | 19A-Ca-0 | 14A-Co-6 | 22A-Co-6 | 17A-Ca-16 | 3B-Ca-16  |
| G       | PTC      | 20A-Co-0 | 15A-Ca-6 | 1B-Ca-6  | 18A-Co-16 | 4B-Co-16  |
| H       | NTC      | 21A-Ca-0 | 16A-Co-6 | 2B-Co-6  | 19A-Ca-16 |           |

  

| PLATE 3 |          |          |          |          |           |           |
|---------|----------|----------|----------|----------|-----------|-----------|
|         | 1-2      | 3-4      | 5-6      | 7-8      | 9-10      | 11-12     |
| A       | 1.00E+05 | 5B-Ca-0  | 13B-Ca-0 | 8B-Co-6  | 16B-Co-6  | 11B-Ca-16 |
| B       | 1.00E+04 | 6B-Co-0  | 14B-Co-0 | 9B-Ca-6  | 17B-Ca-6  | 12B-Co-16 |
| C       | 1.00E+03 | 7B-Ca-0  | 15B-Ca-0 | 10B-Co-6 | 5B-Ca-16  | 13B-Ca-16 |
| D       | 1.00E+02 | 8B-Co-0  | 16B-Co-0 | 11B-Ca-6 | 6B-Co-16  | 14B-Co-16 |
| E       | 1.01E+01 | 9B-Ca-0  | 17B-Ca-0 | 12B-Co-6 | 7B-Ca-16  | 15B-Ca-16 |
| F       | 1.00E+00 | 10B-Co-0 | 5B-Ca-6  | 13B-Ca-6 | 8B-Co-16  | 16B-Co-16 |
| G       | PTC      | 11B-Ca-0 | 6B-Co-6  | 14B-Co-6 | 9B-Ca-16  | 17B-Ca-16 |
| H       | NTC      | 12B-Co-0 | 7B-Ca-6  | 15B-Ca-6 | 10B-Co-16 |           |

  

| PLATE 4 |          |          |          |          |           |          |
|---------|----------|----------|----------|----------|-----------|----------|
|         | 1-2      | 3-4      | 5-6      | 7-8      | 9-10      | 11-12    |
| A       | 1.00E+05 | 18B-Co-0 | 4C-Co-0  | 21B-Ca-6 | 7C-Ca-6   | 2C-Co-16 |
| B       | 1.00E+04 | 19B-Ca-0 | 5C-Ca-0  | 22B-Co-6 | 8C-Co-6   | 3C-Ca-16 |
| C       | 1.00E+03 | 20B-Co-0 | 6C-Co-0  | 1C-Ca-6  | 18B-Co-16 | 4C-Co-16 |
| D       | 1.00E+02 | 21B-Ca-0 | 7C-Ca-0  | 2C-Co-6  | 19B-Ca-16 | 5C-Ca-16 |
| E       | 1.01E+01 | 22B-Co-0 | 8C-Co-0  | 3C-Ca-6  | 20B-Co-16 | 6C-Co-16 |
| F       | 1.00E+00 | 1C-Ca-0  | 18B-Co-6 | 4C-Co-6  | 21B-Ca-16 | 7C-Ca-16 |
| G       | PTC      | 2C-Co-0  | 19B-Ca-6 | 5C-Ca-6  | 22B-Co-16 | 8C-Co-16 |
| H       | NTC      | 3C-Ca-0  | 20B-Co-6 | 6C-Co-6  | 1C-Ca-16  |          |

  

| PLATE 5 |          |          |          |          |           |           |
|---------|----------|----------|----------|----------|-----------|-----------|
|         | 1-2      | 3-4      | 5-6      | 7-8      | 9-10      | 11-12     |
| A       | 1.00E+05 | 9C-Ca-0  | 17C-Ca-0 | 13C-Ca-6 | 9C-Ca-16  | 17C-Ca-16 |
| B       | 1.00E+04 | 10C-Co-0 | 18C-Co-0 | 14C-Co-6 | 10C-Co-16 | 18C-Co-16 |
| C       | 1.00E+03 | 11C-Ca-0 | 19C-Ca-0 | 15C-Ca-6 | 11C-Ca-16 | 19C-Ca-16 |
| D       | 1.00E+02 | 12C-Co-0 | 20C-Co-0 | 16C-Co-6 | 12C-Co-16 | 20C-Co-16 |
| E       | 1.01E+01 | 13C-Ca-0 | 9C-Ca-6  | 17C-Ca-6 | 13C-Ca-16 |           |
| F       | 1.00E+00 | 14C-Co-0 | 10C-Co-6 | 18C-Co-6 | 14C-Co-16 |           |
| G       | PTC      | 15C-Ca-0 | 11C-Ca-6 | 19C-Ca-6 | 15C-Ca-16 |           |
| H       | NTC      | 16C-Co-0 | 12C-Co-6 | 20C-Co-6 | 16C-Co-16 |           |

Table S4. Fecal sample dilution and sample loss during the DNA extraction process.

| Procedure during DNA extraction                      | added | total volume(μl) | factor |
|------------------------------------------------------|-------|------------------|--------|
| 1g of fecal sample                                   |       | 1000             |        |
| 250 mg feces                                         |       | 250              | 4      |
| Added 0.8ml (800μl) CD1 buffer                       | 800   | 1050             | 1      |
| Transfer 0.6ml (600ul) into a new tube               |       | 600              | 1.75   |
| Added 0.2ml (200μl) CD2 buffer                       | 200   | 800              | 1      |
| Transfer 0.7ml (700ul) into a new tube               |       | 700              | 1.14   |
| Added 0.6ml (600μl) CD3 buffer                       | 600   | 1300             | 1      |
| Transfer 1.3ml (1300ul) into a column                |       | 1300             | 1      |
| Added 0.5ml (500μl) EA buffer                        | 500   | 1800             | 1      |
| Added 0.5ml (500μl) C5 buffer                        | 500   | 2300             | 1      |
| Elution of DNA (100 ul) C6 buffer by 1min centrifuge |       | 100              | 1      |
| Take 2ul for the PCR reaction                        |       | 2                | 50     |
|                                                      |       |                  | 400    |

Table S5. DNA distribution from the fecal samples across the day, dairy farm, and treatment on two different sequencing runs.

| PLATE 1 |          |          |           |          |          |          |          |          |           |          |          |           |
|---------|----------|----------|-----------|----------|----------|----------|----------|----------|-----------|----------|----------|-----------|
|         | 1        | 2        | 3         | 4        | 5        | 6        | 7        | 6        | 9         | 10       | 11       | 12        |
| A       | 1A-Ca-0  | 1A-Ca-6  | 1A-Ca-16  | 1B-Ca-0  | 1B-Ca-6  | 1B-Ca-16 | 1C-Ca-0  | 1C-Ca-6  | 1C-Ca-16  | 9A-Ca-0  | 9A-Ca-6  | 9A-Ca-16  |
| B       | 2A-Co-0  | 2A-Co-6  | 2A-Co-16  | 2B-Co-0  | 2B-Co-6  | 2B-Co-16 | 2C-Co-0  | 2C-Co-6  | 2C-Co-16  | 9B-Ca-0  | 9B-Ca-6  | 9B-Ca-16  |
| C       | 3A-Ca-0  | 3A-Ca-6  | 3A-Ca-16  | 3B-Ca-0  | 3B-Ca-6  | 3B-Ca-16 | 3C-Ca-0  | 3C-Ca-6  | 3C-Ca-16  | 9C-Ca-0  | 9C-Ca-6  | 9C-Ca-16  |
| D       | 4A-Co-0  | 4A-Co-6  | 4A-Co-16  | 4B-Co-0  | 4B-Co-6  | 4B-Co-16 | 4C-Co-0  | 4C-Co-6  | 4C-Co-16  | 10A-Co-0 | 10A-Co-6 | 10A-Co-16 |
| E       | 5A-Ca-0  | 5A-Ca-6  | 5A-Ca-16  | 5B-Ca-0  | 5B-Ca-6  | 5B-Ca-16 | 5C-Ca-0  | 5C-Ca-6  | 5C-Ca-16  | 10B-Co-0 | 10B-Co-6 | 10B-Co-16 |
| F       | 6A-Co-0  | 6A-Co-6  | 6A-Co-16  | 6B-Co-0  | 6B-Co-6  | 6B-Co-16 | 6C-Co-0  | 6C-Co-6  | 6C-Co-16  | 10C-Co-0 | 10C-Co-6 | 10C-Co-16 |
| G       | 7A-Ca-0  | 7A-Ca-6  | 7A-Ca-16  | 7B-Ca-0  | 7B-Ca-6  | 7B-Ca-16 | 7C-Ca-0  | 7C-Ca-6  | 7C-Ca-16  | 21A-Ca-0 | 21A-Ca-6 | 21A-Ca-16 |
| H       | 8A-Co-0  | 8A-Co-6  | 8A-Co-16  | 8B-Co-0  | 8B-Co-6  | 8B-Co-16 | 8C-Co-0  | 8C-Co-6  | 8C-Co-16  | 21B-Ca-0 | 21B-Ca-6 | 21B-Ca-16 |
|         |          |          |           |          |          |          |          |          |           |          |          |           |
| PLATE 2 |          |          |           |          |          |          |          |          |           |          |          |           |
|         | 1        | 2        | 3         | 4        | 5        | 6        | 7        | 6        | 9         | 10       | 11       | 12        |
| A       | 13A-Ca-0 | 13A-Ca-6 | 13A-Ca-16 | 13B-Ca-0 | 13B-Ca-6 | 13B-16   | 13C-Ca-0 | 13C-Ca-6 | 13C-Ca-16 | 11A-Ca-0 | 11A-Ca-6 | 11A-Ca-16 |
| B       | 14A-Co-0 | 14A-Co-6 | 14A-Co-16 | 14B-Co-0 | 14B-Co-6 | 14B-16   | 14C-Co-0 | 14C-Co-6 | 14C-Co-16 | 11B-Ca-0 | 11B-Ca-6 | 11B-Ca-16 |
| C       | 15A-Ca-0 | 15A-Ca-6 | 15A-Ca-16 | 15B-Ca-0 | 15B-Ca-6 | 15B-16   | 15C-Ca-0 | 15C-Ca-6 | 15C-Ca-16 | 11C-Ca-0 | 11C-Ca-6 | 11C-Ca-16 |
| D       | 16A-Co-0 | 16A-Co-6 | 16A-Co-16 | 16B-Co-0 | 16B-Co-6 | 16B-16   | 16C-Co-0 | 16C-Co-6 | 16C-Co-16 | 12A-Co-0 | 12A-Co-6 | 12A-Co-16 |
| E       | 17A-Ca-0 | 17A-Ca-6 | 17A-Ca-16 | 17B-Ca-0 | 17B-Ca-6 | 17B-16   | 17C-Ca-0 | 17C-Ca-6 | 17C-Ca-16 | 12B-Co-0 | 12B-Co-6 | 12B-Co-16 |
| F       | 18A-Co-0 | 18A-Co-6 | 18A-Co-16 | 18B-Co-0 | 18B-Co-6 | 18B-16   | 18C-Co-0 | 18C-Co-6 | 18C-Co-16 | 12C-Co-0 | 12C-Co-6 | 12C-Co-16 |
| G       | 19A-Ca-0 | 19A-Ca-6 | 19A-Ca-16 | 19B-Ca-0 | 19B-Ca-6 | 19B-16   | 19C-Ca-0 | 19C-Ca-6 | 19C-Ca-16 | 22A-Co-0 | 22A-Co-6 | 22A-Co-16 |
| H       | 20A-Co-0 | 20A-Co-6 | 20A-Co-16 | 20B-Co-0 | 20B-Co-6 | 20B-16   | 20C-Co-0 | 20C-Co-6 | 20C-Co-16 | 22B-Co-0 | 22B-Co-6 | 22B-Co-16 |



Table S6. Descriptive statistics on the distribution of non-standardized gene detections across treatment and sampling days.

| Growth metric (Log <sub>10</sub> ) | Treatment | Descriptive Statistics | Day           |               |               |
|------------------------------------|-----------|------------------------|---------------|---------------|---------------|
|                                    |           |                        | 0             | 6             | 16            |
| <i>bla</i> <sub>CMY-2</sub>        | Treated   | Sample Size            | 51            | 64            | 63            |
|                                    |           | Mean                   | 4.398         | 5.094         | 5.355         |
|                                    |           | Standard Error         | 0.155         | 0.079         | 0.089         |
|                                    |           | 95% CI                 | 4.093-4.704   | 4.939-5.249   | 5.18-5.529    |
|                                    |           | Median                 | 4.355         | 5.098         | 5.282         |
|                                    | Untreated | Sample Size            | 52            | 54            | 64            |
|                                    |           | Mean                   | 4.443         | 4.332         | 4.618         |
|                                    |           | Standard Error         | 0.134         | 0.112         | 0.103         |
|                                    |           | 95% CI                 | 4.179-4.708   | 4.111-4.553   | 4.416-4.82    |
|                                    |           | Median                 | 4.380         | 4.311         | 4.700         |
| <i>bla</i> <sub>CTX-M</sub>        | Treated   | Sample Size            | 57            | 60            | 62            |
|                                    |           | Mean                   | 4.130         | 4.290         | 4.004         |
|                                    |           | Standard Error         | 0.102         | 0.106         | 0.087         |
|                                    |           | 95% CI                 | 3.929-4.331   | 4.082-4.497   | 3.834-4.175   |
|                                    |           | Median                 | 4.086         | 4.268         | 3.952         |
|                                    | Untreated | Sample Size            | 56            | 56            | 61            |
|                                    |           | Mean                   | 4.285         | 4.137         | 4.183         |
|                                    |           | Standard Error         | 0.091         | 0.104         | 0.102         |
|                                    |           | 95% CI                 | 4.107-4.464   | 3.933-4.341   | 3.983-4.383   |
|                                    |           | Median                 | 4.392         | 4.145231      | 4.106         |
| <i>mphA</i>                        | Treated   | Sample Size            | 54            | 58            | 60            |
|                                    |           | Mean                   | 5.483         | 5.329         | 5.305         |
|                                    |           | Standard Error         | 0.093         | 0.080         | 0.107         |
|                                    |           | 95% CI                 | 5.666-5.666   | 5.486-5.486   | 5.516-5.516   |
|                                    |           | Median                 | 5.465         | 5.285         | 5.087         |
|                                    | Untreated | Sample Size            | 60            | 58            | 56            |
|                                    |           | Mean                   | 5.475         | 5.336         | 5.508         |
|                                    |           | Standard Error         | 0.078         | 0.091         | 0.126         |
|                                    |           | 95% CI                 | 5.628-5.628   | 5.515-5.515   | 5.755-5.755   |
|                                    |           | Median                 | 5.407         | 5.188         | 5.243         |
| <i>qnrB19</i>                      | Treated   | Sample Size            | 63            | 64            | 64            |
|                                    |           | Mean                   | 4.614         | 4.372         | 4.581         |
|                                    |           | Standard Error         | 0.090         | 0.090         | 0.122         |
|                                    |           | 95% CI                 | 4.437-4.79    | 4.196-4.548   | 4.341-4.822   |
|                                    |           | Median                 | 4.624         | 4.366         | 4.365         |
|                                    | Untreated | Sample Size            | 64            | 64            | 64            |
|                                    |           | Mean                   | 4.738         | 4.333         | 4.572         |
|                                    |           | Standard Error         | 0.104         | 0.103         | 0.114         |
|                                    |           | 95% CI                 | 4.533-4.942   | 4.132-4.535   | 4.347-4.797   |
|                                    |           | Median                 | 4.804         | 4.280         | 4.265         |
| 16S rRNA                           | Treated   | Sample Size            | 64            | 64            | 64            |
|                                    |           | Mean                   | 10.518        | 10.213        | 10.406        |
|                                    |           | Standard Error         | 0.058         | 0.043         | 0.082         |
|                                    |           | 95% CI                 | 10.404-10.632 | 10.128-10.298 | 10.245-10.567 |
|                                    |           | Median                 | 10.667        | 10.318        | 10.516        |
|                                    | Untreated | Sample Size            | 64            | 64            | 64            |
|                                    |           | Mean                   | 10.629        | 10.325        | 10.592        |
|                                    |           | Standard Error         | 0.038         | 0.069         | 0.062         |
|                                    |           | 95% CI                 | 10.553-10.704 | 10.189-10.46  | 10.471-10.713 |
|                                    |           | Median                 | 10.667        | 10.505        | 10.651        |

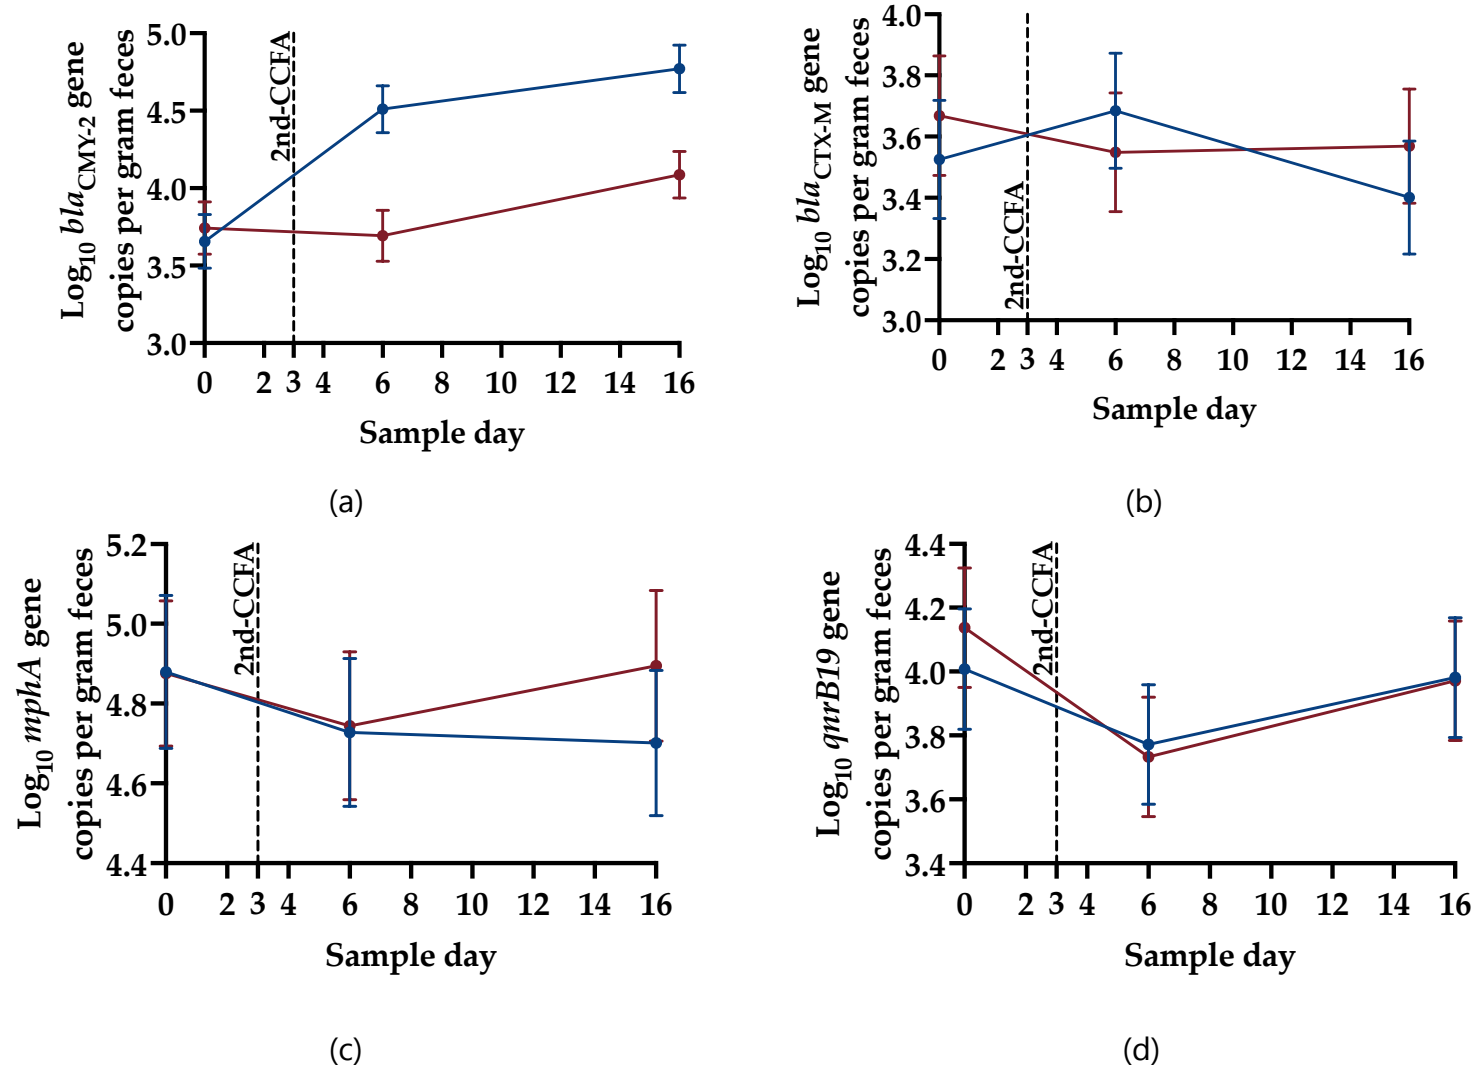

Figure S1. Marginal means graphs showing the linear regression model of non-standardized  $\log_{10}$  genes copies per gram of feces based on (a) *bla*<sub>CMY-2</sub>, (b) *bla*<sub>CTX-M</sub>, (c) *mphA*, and (d) *qnrB19*. Data were analyzed using Stata/BE version 17.0 and graphed using GraphPad Prism version 10.0.2.

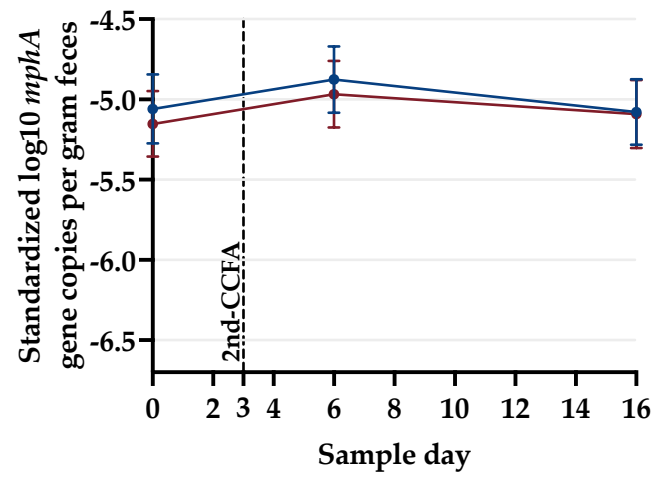

(a)

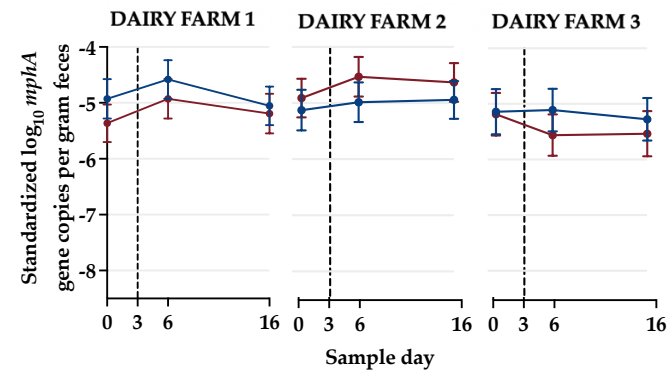

(b)

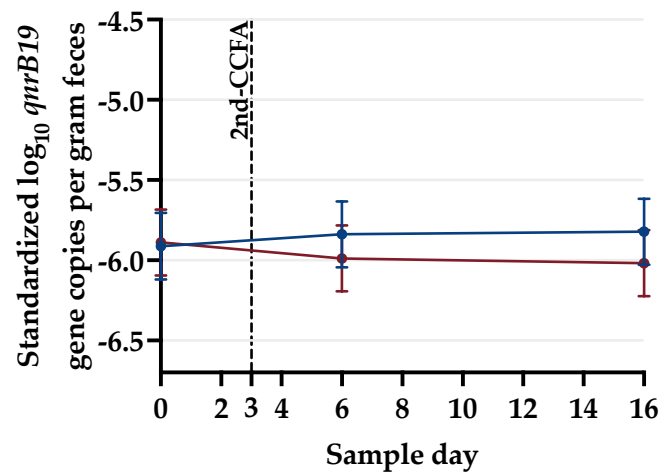

(c)

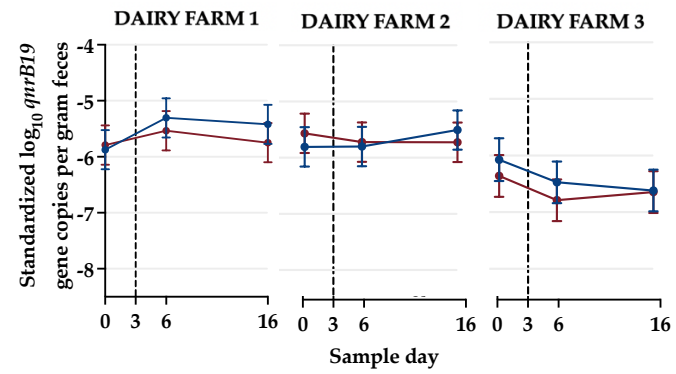

(d)

Figure S2. Marginal means graphs showing the linear effect model of 16S rRNA-standardized  $\log_{10}$  genes copies per gram of feces based on (a) *mphA* and (b) *mphA* by farm. (a) *qnrB19*, and (b) *qnrB19* by farm. Data were analyzed using Stata/BE version 17.0 and graphed using GraphPad Prism version 10.0.2.

## Per Sequence Quality Scores

380

Help

The number of reads with average quality scores. Shows if a subset of reads has poor quality.

Flat image plot. Toolbox functions such as highlighting / hiding samples will not work (see the docs).

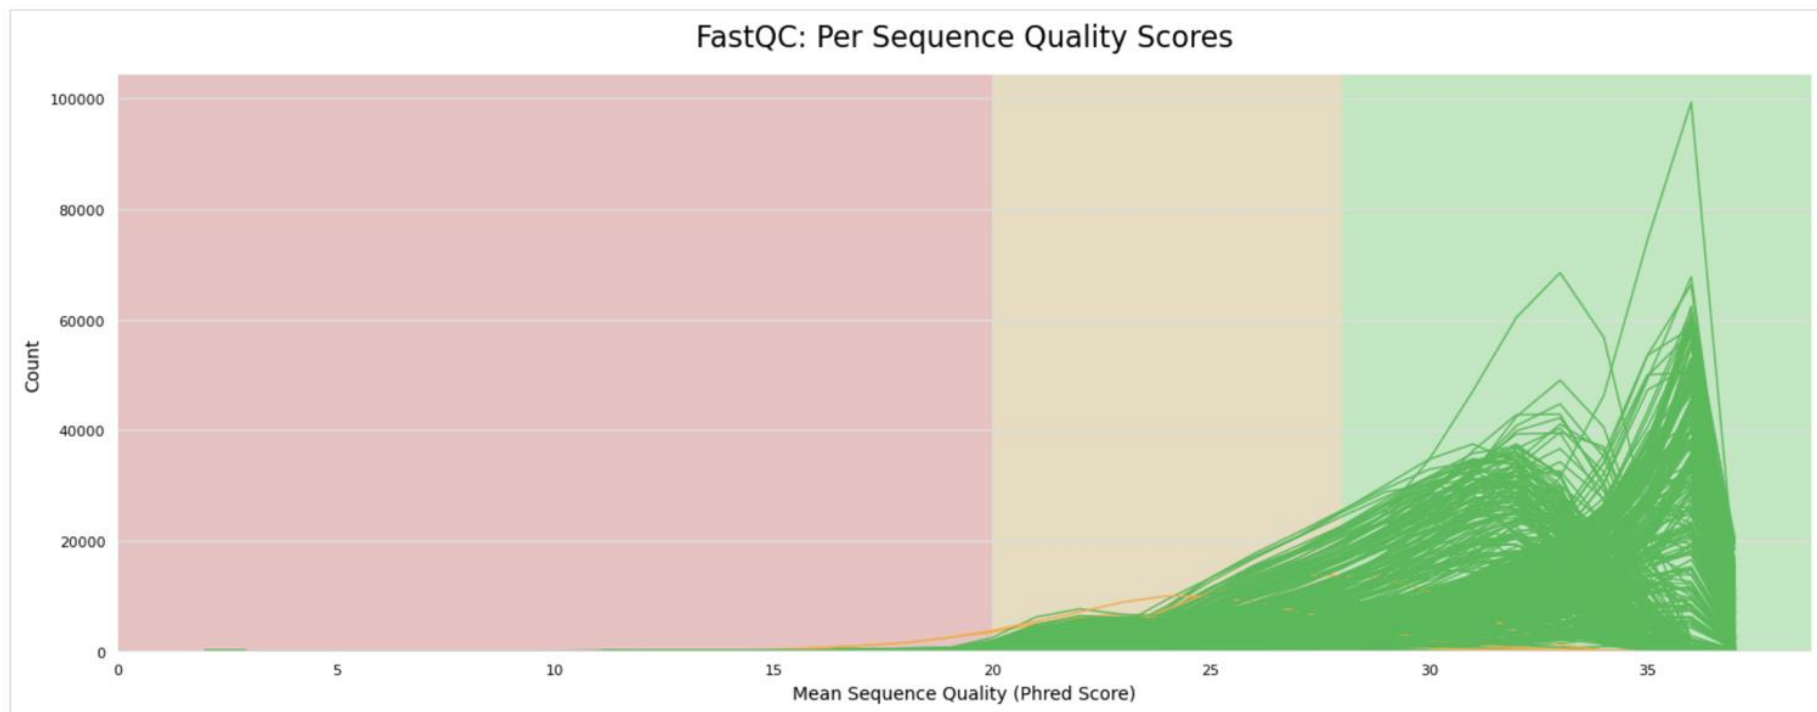

Figure S3. Per sequences quality score from MultiQC output. Graphic produced by MultiQC.

## Alpha rarefaction

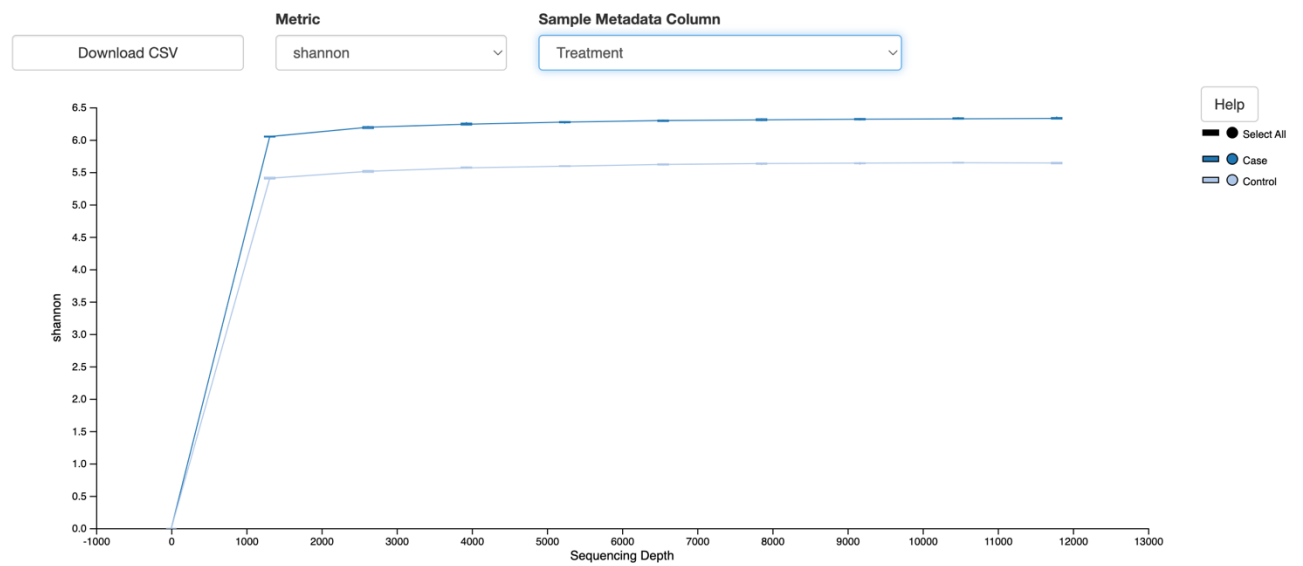

## Alpha rarefaction

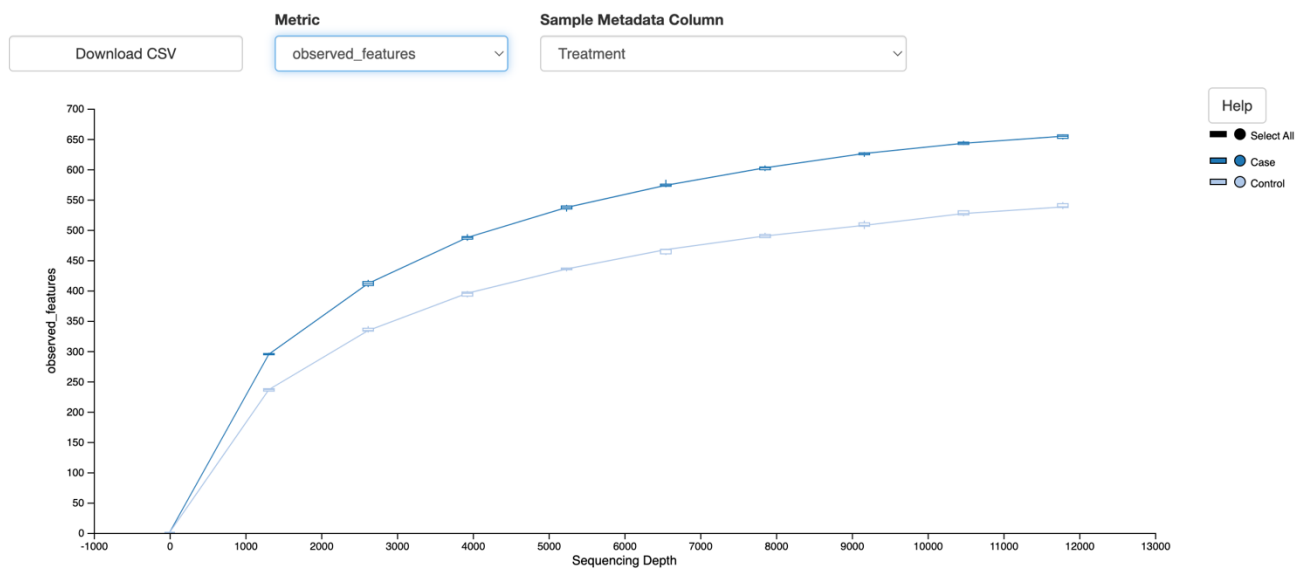

Figure S4. Rarefaction curves displayed by treatment.

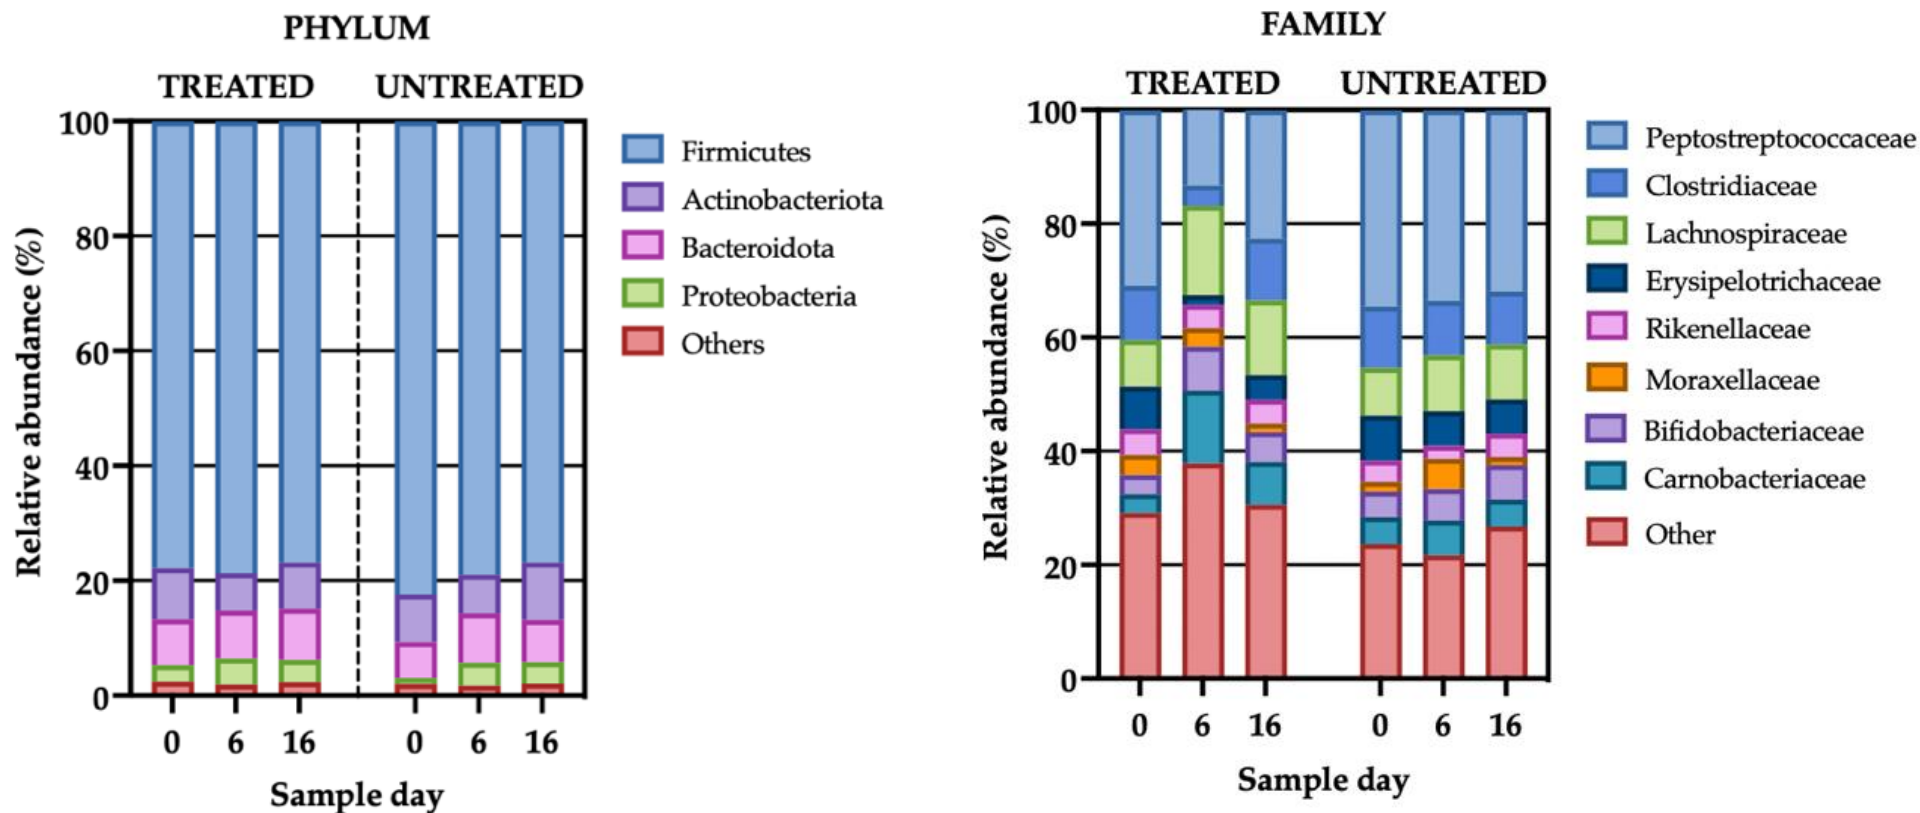

Figure S5. Fecal microbiome relative abundance phylogenetic profile by day and treatment. Comparisons of relative abundance within the bacteria domain at the level of bacterial phylum and family. Graphs were generated using GraphPad Prism version 10.0.2.

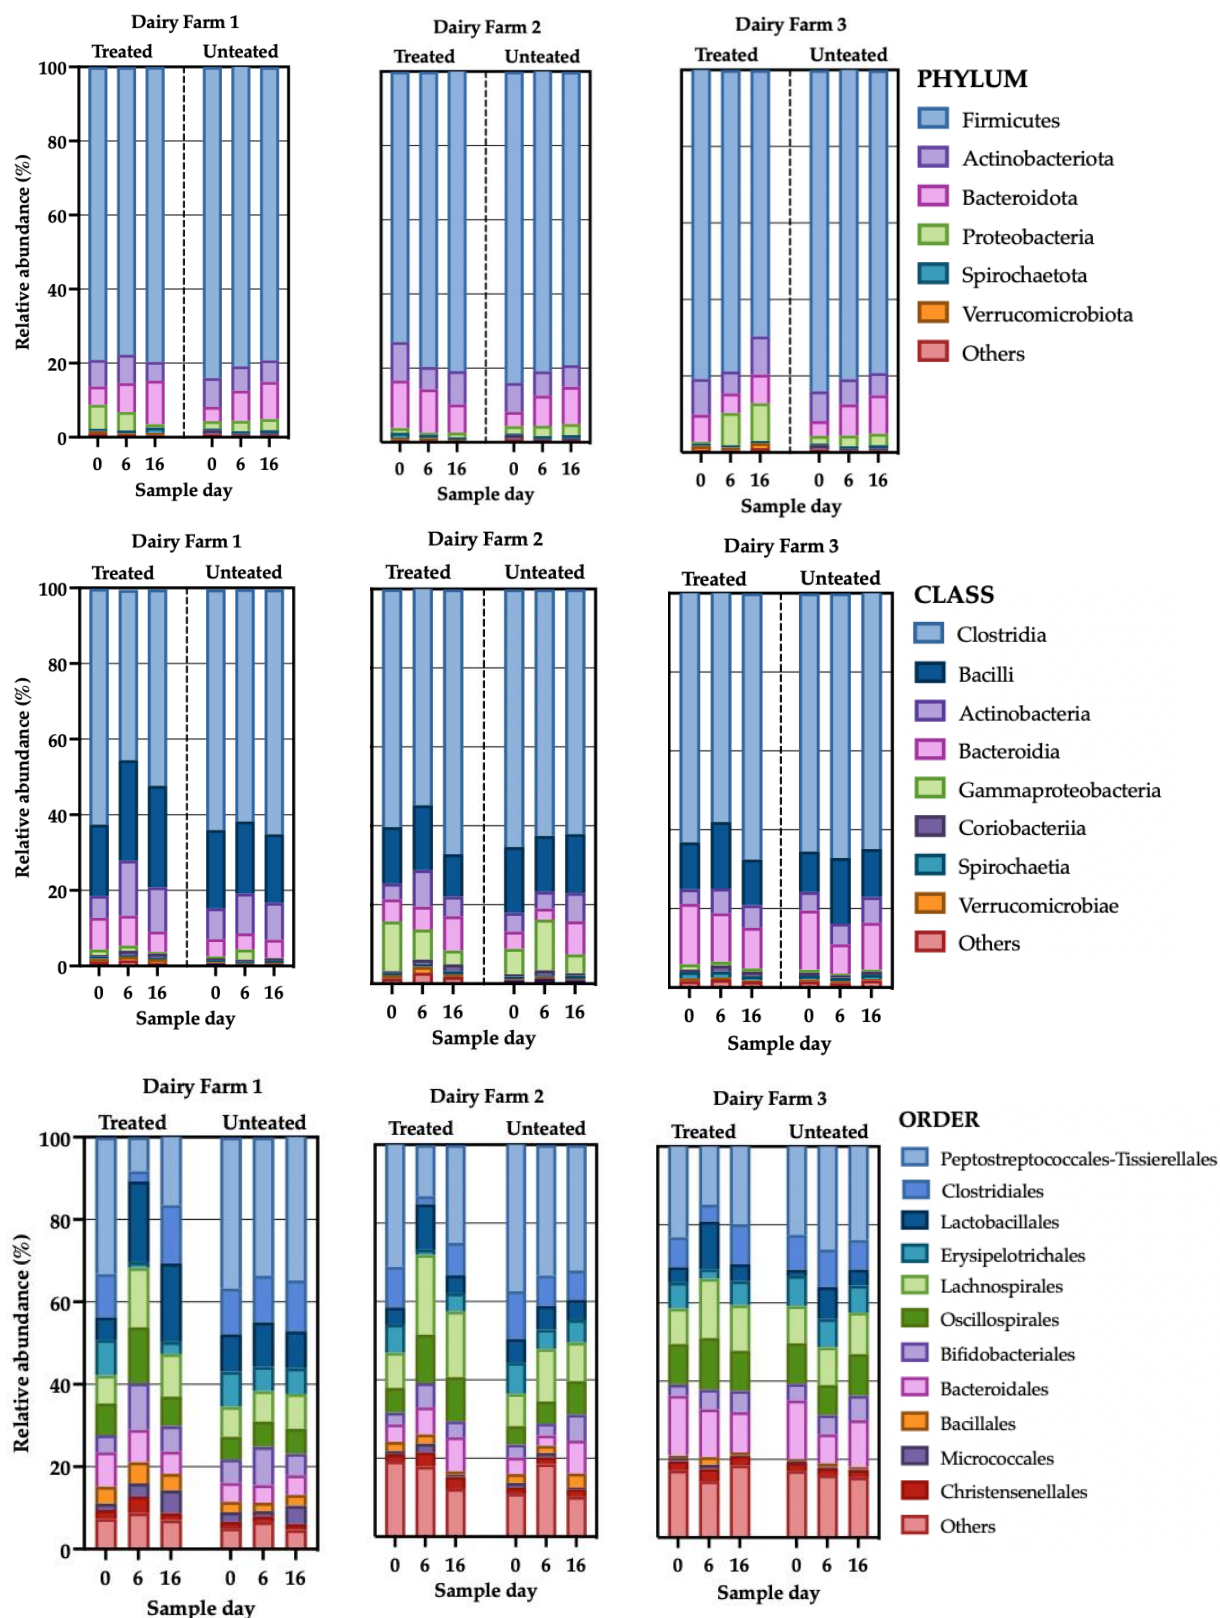

Figure S6. Fecal microbiome relative abundance phylogenetic profile by dairy farm, day, and treatment. Comparisons of relative abundance at the level of bacterial phylum, class, and order. Graphs were generated using GraphPad Prism version 10.0.2.

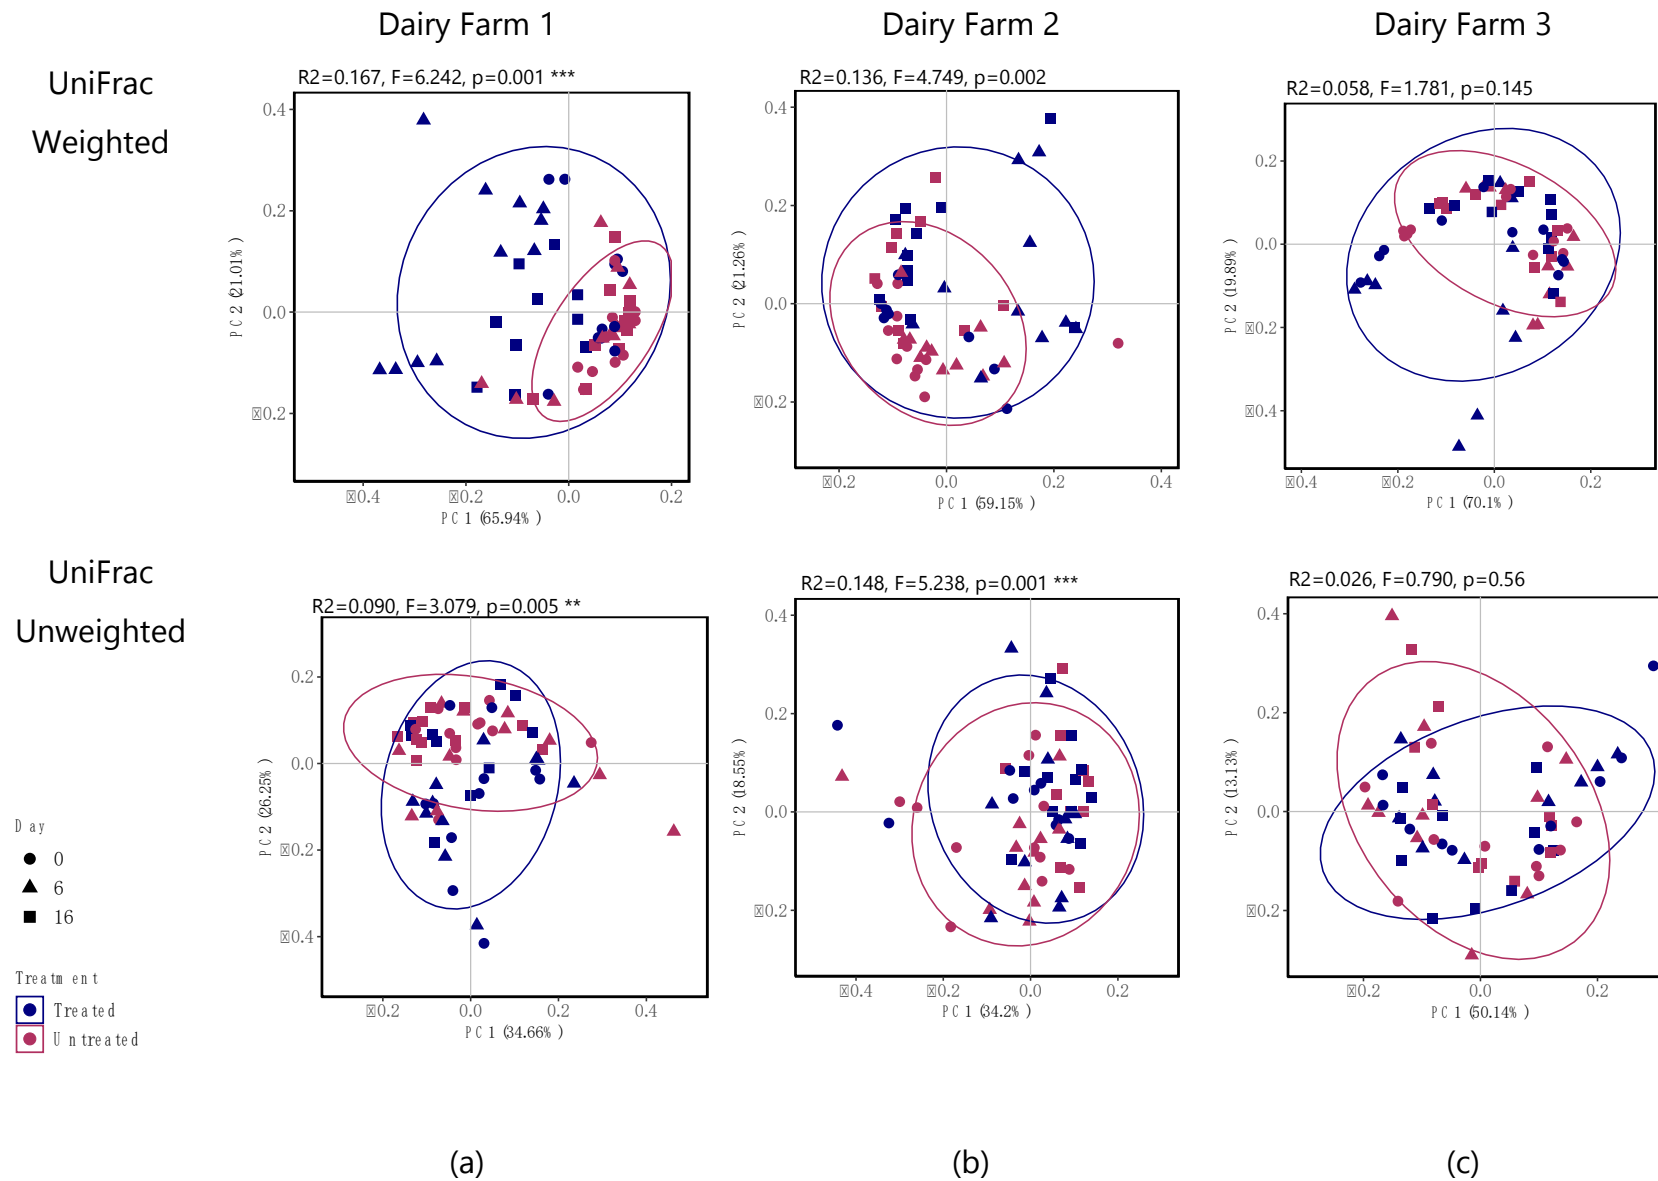

Figure S7. Fecal microbial beta-diversity represented in Principal Component Ordinal Analyses (PCoA) by dairy farm and clustered by day and treatment. UniFrac distances between bacterial community composition based on (top three) weighted (quantitative) and (bottom three) unweighted (qualitative). Figures were created using the Vegan package in R Studio.



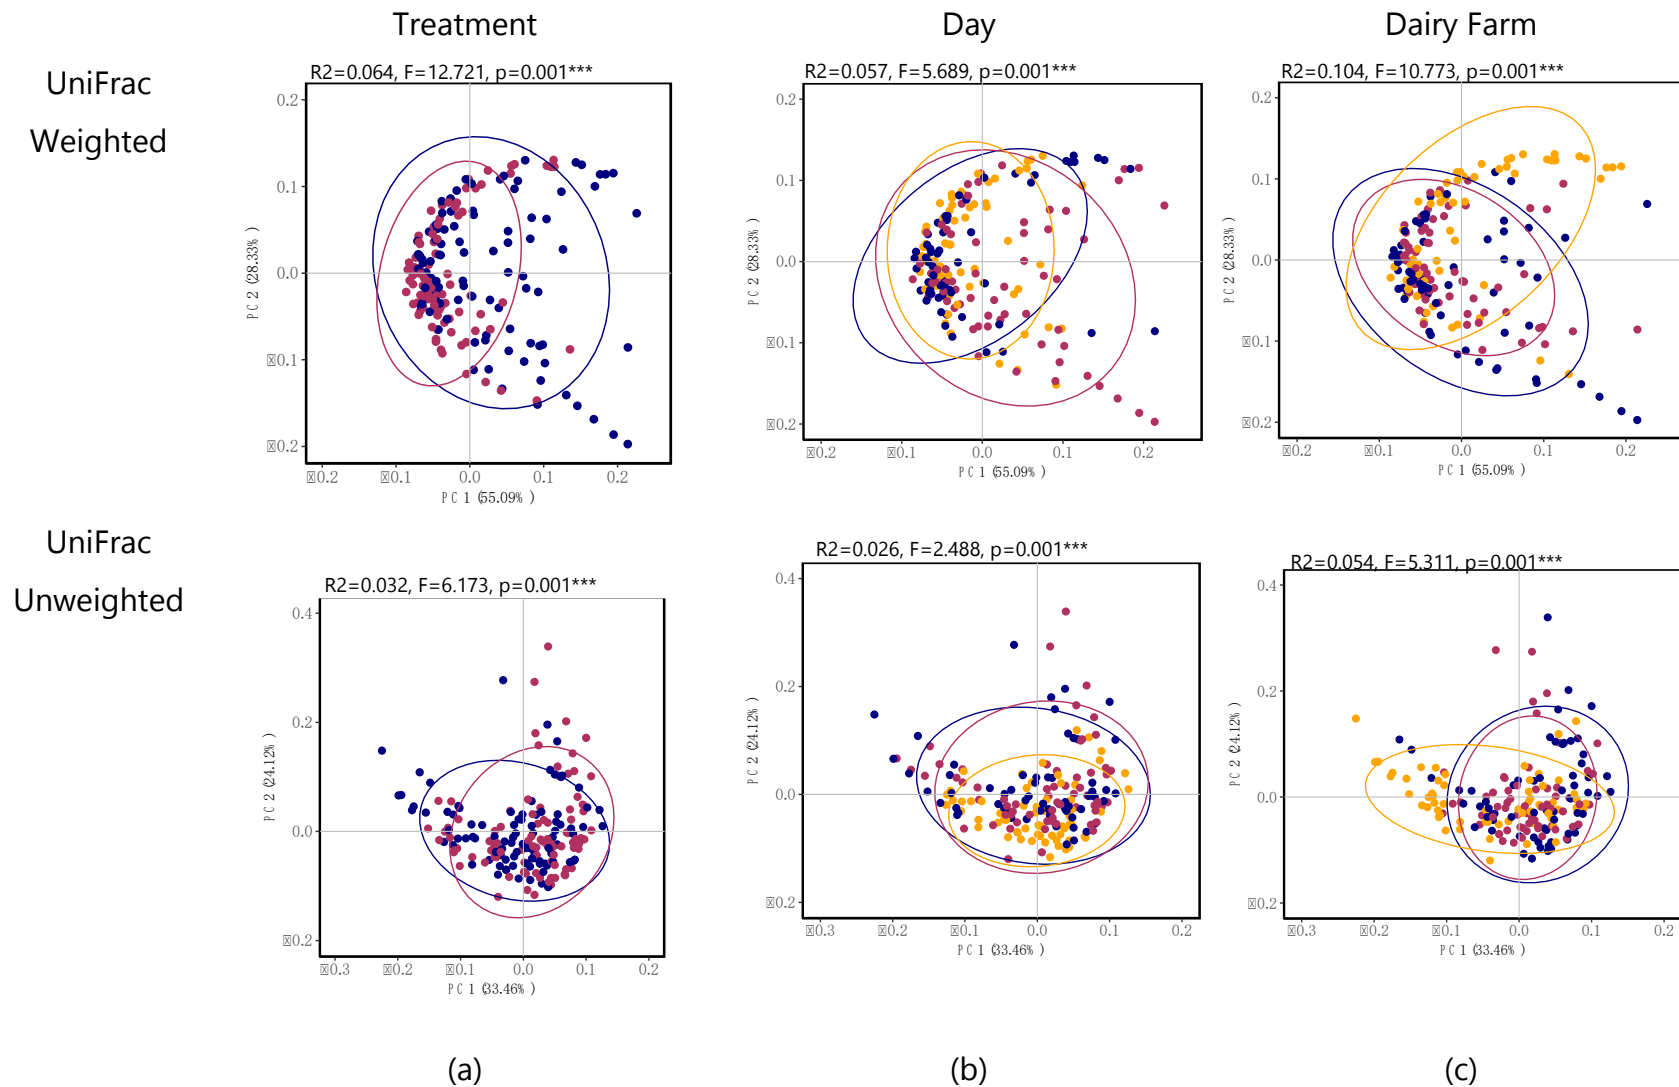

Figure S8. Fecal microbial beta-diversity represented in Principal Component Ordinal Analyses (PCoA) by dairy, day, and treatment. UniFrac distances between bacterial community composition based on (top three) weighted (quantitative) and (bottom three) unweighted (qualitative). Figures were created using the Vegan package in R Studio.
